# Supplementary material for: Electrorheological elastomer for simultaneous enhancements in durability and micro-vibration suppression
Source: Royal Society of Chemistry journal article supplement (doi:10.1039/d5tc00023h), 2025-01-01
Supplement: d5tc00023h1.pdf [file d5tc00023h1.pdf]

## Supplementary material

Electrorheological elastomer for simultaneous enhancements in durability and micro-vibration suppression

Sai Chen<sup>a</sup>, Leizhi Wang<sup>b</sup>, Ke Zhang<sup>a, \*</sup>, Wen Bai<sup>c</sup>, Yao Li<sup>d</sup>

### AUTHOR ADDRESS

<sup>a</sup> School of Chemistry and Chemical Engineering, Harbin Institute of Technology, Harbin 150001, P. R. China;

<sup>b</sup> School of Mechanical Engineering, Ningxia University, Yinchuan 750021, China;

<sup>c</sup> Key Laboratory of Earthquake Engineering and Engineering Vibration, Institute of Engineering Mechanics, China Earthquake Administration, Harbin 150080, China;

<sup>d</sup> Center for Composite Materials and Structure, Harbin Institute of Technology, Harbin 150001, P. R. China;

### AUTHOR INFORMATION

\* Corresponding Author

*E-mail address:* [zhangke@hit.edu.cn](mailto:zhangke@hit.edu.cn)

## Mechanical analysis

Harmonic excitation with variable displacement frequency and amplitude was used. The top of the counterweights and the vibration exciter were each connected to a load cell respectively, which recorded the response and excitation force signals. The

transmission function is defined as follows:

$$T = \log_{10} \left[ \frac{Z_2}{Z_1} \right]^2$$

where  $T$  is the transmission amplitude,  $Z_2$  is the response signal, and  $Z_1$  is the excitation signal.

Since the dynamic mechanical properties of ERE are independent of the excitation amplitude and frequency, the vibration differential equation of the ERE vibration isolation system is derived as follows:

$$m\ddot{x}_p + (c_0 + \Delta c)(\dot{x}_p - \dot{x}_e) + (k_0 + \Delta k)(x_p - x_e) = 0$$

$c_0$  and  $\Delta c$  are the zero-field damping and field damping (damping change due to applied electric field) of the ERE isolation;  $k_0$  and  $\Delta k$  are the zero-field stiffness and field damping (stiffness change due to applied electric field) of the ERE isolation;  $x_p$  and  $x_e$  are the base excitation and response displacements of the primary system, respectively. The vibration transfer function of the system is obtained by the Laplace transformation:

$$H(s) = \frac{X_p(s)}{X_e(s)} = \frac{(c_0 + \Delta c)s + (k_0 + \Delta k)}{ms^2 + (c_0 + \Delta c)s + (k_0 + \Delta k)}$$

At the same time, the Laplace transform is converted to a Fourier transform to obtain the frequency response function of the system.

$$H(s) = \frac{X_p(s)}{X_e(s)} = \frac{j\omega c + k}{-m\omega^2 + j\omega c + k}$$

The transfer function in the real number domain is given as a function of the excitation frequency, the natural frequency of the system, the ERE stiffness, the ERE damping and the primary mass.

$$H(s) = \frac{|X_p(j\omega)|}{|X_e(j\omega)|} = \sqrt{\frac{1 + 4\xi^2\eta^2}{(1 - \eta^2)^2 + 4\xi^2\eta^2}}$$

In order to evaluate the damping force under different electric field, the effective damping coefficient ( $C_{eff}$ ) calculated as follows:

$$C_{eff} = H/2\pi^2 f X^2$$

The parameter  $H$ , is the energy dissipated by the ER damper in one cycle, corresponding to the area enclosed within the hysteresis loop of stress-strain curve.

Where,  $f$  is the excitation frequency, and  $X$  is the excitation amplitude.

Table S1. The tabular data of EREs including relaxation stress, zero-field modulus ( $E_0$ ), electro-induced modulus ( $\Delta E$ ), storage modulus ( $E'$ ), and loss modulus ( $E''$ ) at 10Hz.

| sample                      | relaxation stress<br>(MPa) | $E_0$ (MPa) | $\Delta E$ (MPa) | $E'$ (MPa) | $E''$ (MPa) |
|-----------------------------|----------------------------|-------------|------------------|------------|-------------|
| TiO <sub>2</sub> :HCs=2:1   | 0.03                       | 0.68        | 0.06             | 0.58       | 0.06        |
| TiO <sub>2</sub> :HCs=1:1   | 0.05                       | 1.15        | 0.25             | 1.45       | 0.19        |
| TiO <sub>2</sub> :HCs=1:1.5 | 0.04                       | 0.94        | 0.15             | 1.41       | 0.19        |
| TiO <sub>2</sub> :HCs=1:2   | 0.04                       | 0.77        | 0.14             | 0.82       | 0.12        |
| TiO <sub>2</sub> :HCs=1:4   | 0.03                       | 0.63        | 0.07             | 0.88       | 0.12        |

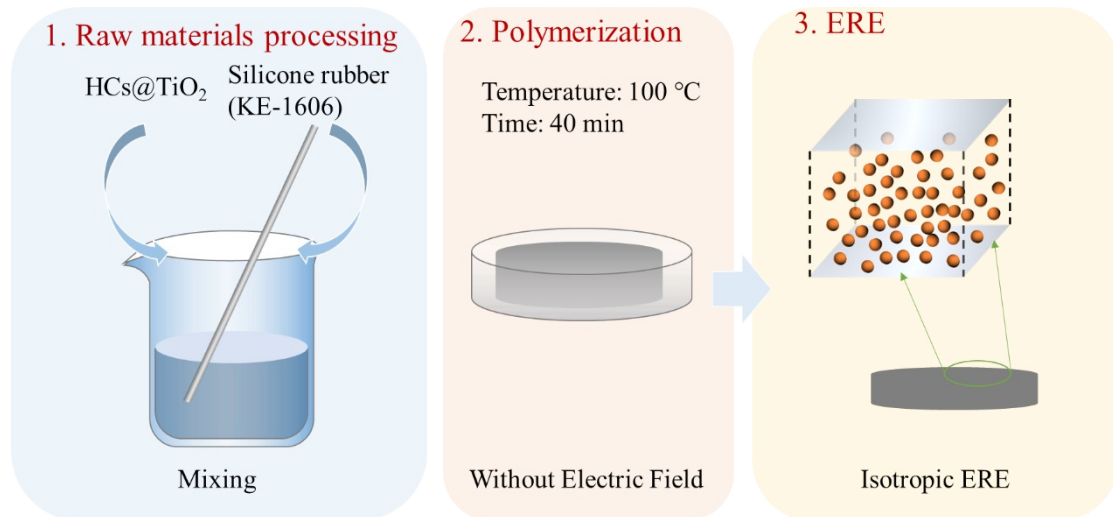

Diagram S1. Schematic illustration for the preparation of EREs.

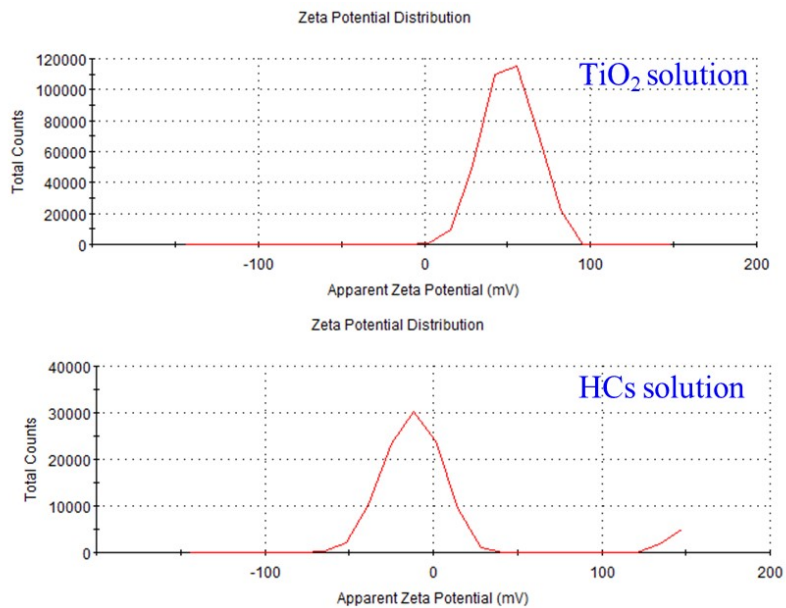

Figure S1. Zeta potential of TiO<sub>2</sub> and HCs ethanol solution.

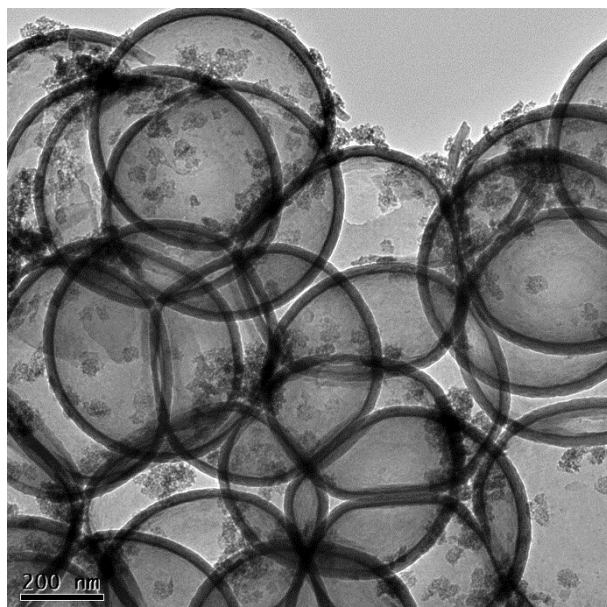

Figure S2. TEM image of  $\text{TiO}_2$ :HCs particles with the ratio of 1: 1.

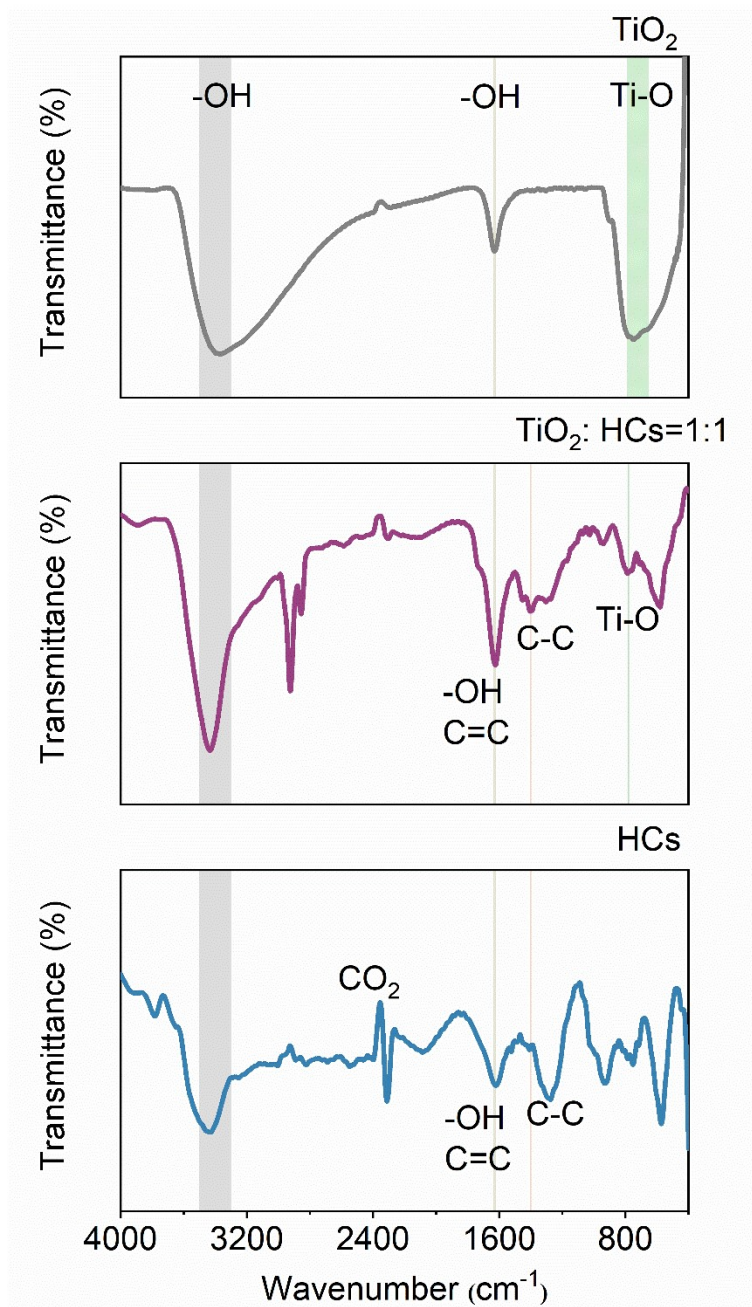

Figure S3. FTIR spectrum of  $\text{TiO}_2$ ,  $\text{TiO}_2:\text{HCs}$ , and  $\text{HCs}$  samples.



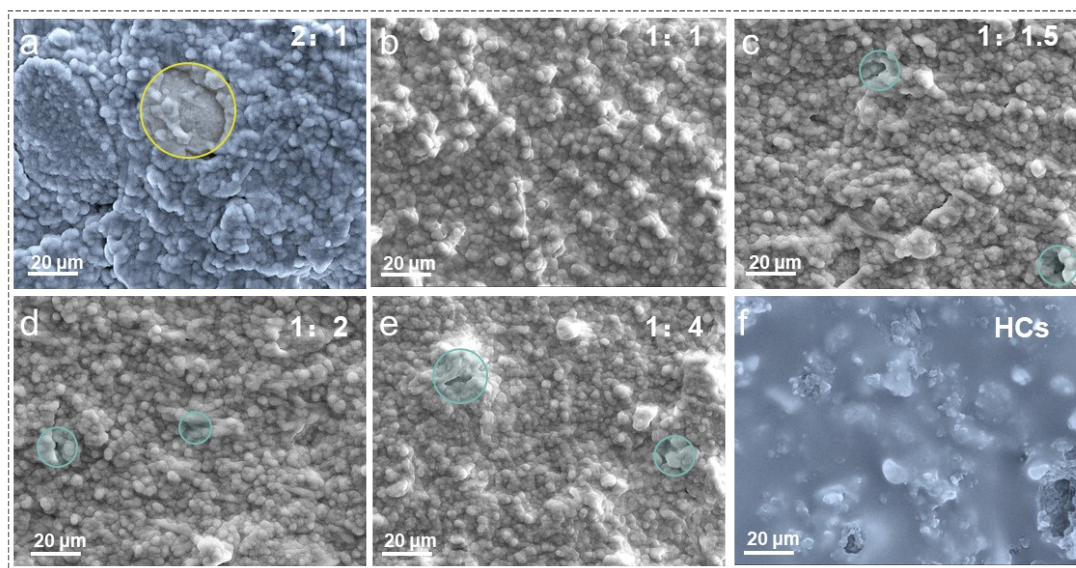

Figure S4. SEM images for cross-section of EREs with different TiO<sub>2</sub>: HCs, (a) 2:1, (b) 1:1, (c) 1:1.5, (d) 1:2, (e) 1:4, (f) pure HCs.

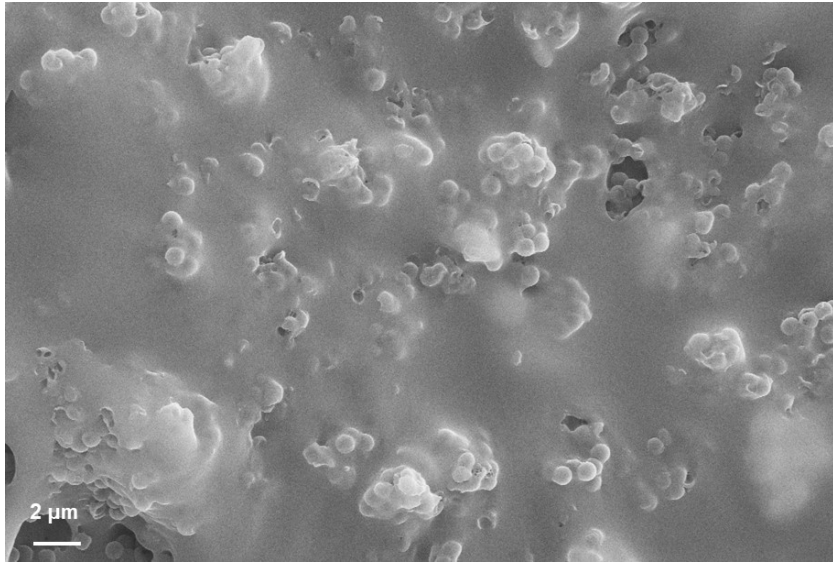

Figure S5. SEM images of the cross section of EREs following the compressive test.

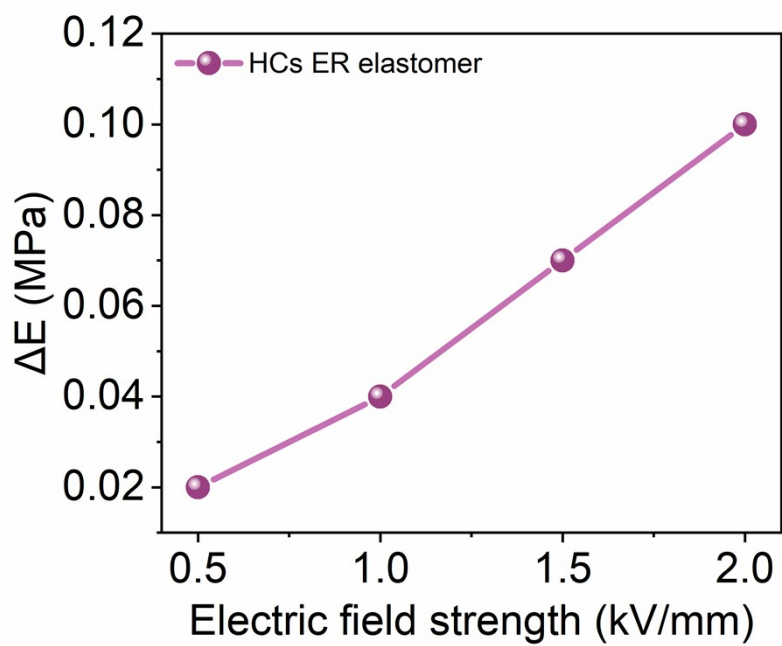

Figure S6. The relative elastic modulus ( $\Delta E$ ) of HCs ERE at different electric field strength.

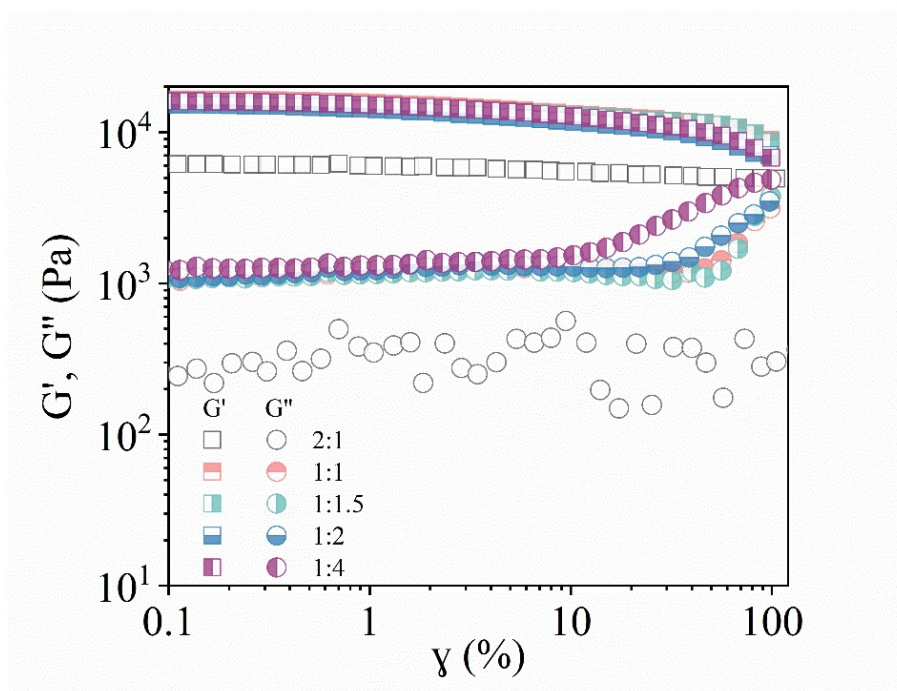

Figure S7. The strain dependence of the storage modulus ( $G'$ ) and loss modulus ( $G''$ ) for ERE with different  $\text{TiO}_2$ :HCs at shear mode.

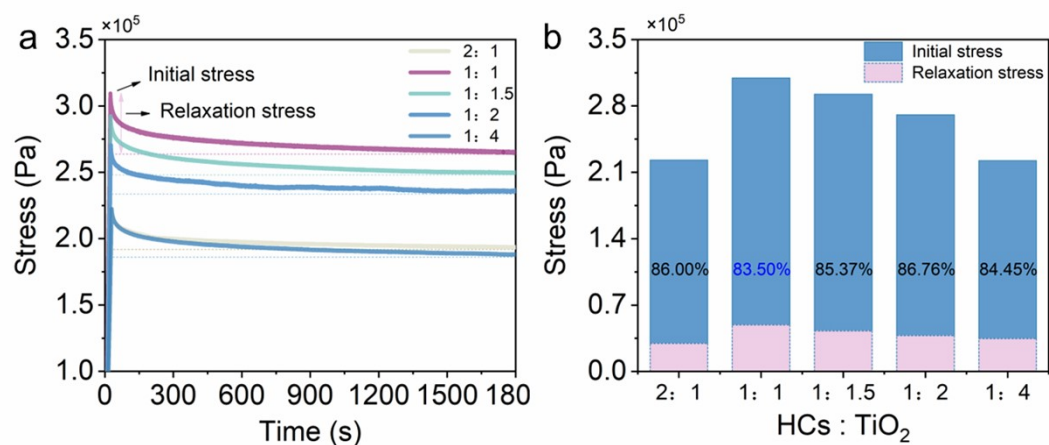

Figure S8. Stress relaxation data of TiO<sub>2</sub>/HCs ERE with different TiO<sub>2</sub>: HCs, (a) Stress relaxation vs time curve, (b) Initial stress and relaxation stress analysis vs different ratio.
